# 1 Modeling cell infection via virus-producing cells rather than free 2 infectious virus significantly improves fits of *in vitro* viral kinetic data

3 Veronika Bernhauerová<sup>1†</sup>, Veronica V. Rezelj<sup>1</sup>, Laura I. Levi<sup>1</sup>, and Marco Vignuzzi<sup>1†</sup>

4 <sup>1</sup>Viral Populations and Pathogenesis Unit, Department of Virology, Institut Pasteur, CNRS UMR 3569, F-75015,  
5 Paris, France

6 <sup>†</sup>Authors for correspondence: marco.vignuzzi@pasteur.fr, veronika.bernhauerova@pasteur.fr

## 7 **Abstract**

8 Chikungunya and Zika viruses are arthropod-borne viruses that pose significant threat to public health.  
9 Experimental data show that during *in vitro* infection both viruses exhibit qualitatively distinct repli-  
10 cation cycle kinetics. Chikungunya viral load rapidly accumulates within the first several hours post  
11 infection whereas Zika virus begins to increase at much later times. We sought to characterize these  
12 qualitatively distinct *in vitro* kinetics of chikungunya and Zika viruses by fitting a family of mathe-  
13 matical models to time course viral load datasets. We demonstrate that the standard viral kinetic  
14 model, which considers that new infections result only from free virus penetrating susceptible cells,  
15 does not fit experimental data as well as a model in which the number of virus-infected cells is the  
16 primary determinant of infection rate. We provide biologically meaningful quantifications of the main  
17 viral kinetic parameters and show that our results support cell-to-cell or localized transmission as a  
18 significant contributor to viral infection with chikungunya and Zika viruses.

19

## 20 **Importance**

21 Mathematical modeling has become a useful tool to tease out information about virus-host interactions  
22 and thus complements experimental work in characterizing and quantifying processes within viral  
23 replication cycle. Importantly, mathematical models can fill in incomplete data sets and identify key  
24 parameters of infection, provided the appropriate model is used. The *in vitro* time course dynamics of  
25 mosquito transmitted viruses, such as chikungunya and Zika, have not been studied by mathematical  
26 modeling and thus limits our knowledge about quantitative description of the individual determinants  
27 of viral replication cycle. This study employs dynamical modeling framework to show that the rate at

28 which cells become virus-infected is proportional to the number of virus-infected cells rather than free  
29 extracellular virus in the milieu, a widely accepted assumption in models of viral infections. Using  
30 the refined mathematical model in combination with viral load data, we provide quantification of  
31 the main drivers of chikungunya and Zika *in vitro* kinetics. Together, our results bring quantitative  
32 understanding of the basic components of chikungunya and Zika virus dynamics.

## 33 Introduction

34 Chikungunya (CHIKV) and Zika (ZIKV) viruses are arthropod-borne viruses (arbovirus) primarily  
35 transmitted through a bite of infected *Aedes* mosquitoes, and their continuous re-emergence pose an  
36 important public health threat. CHIKV was originally isolated in 1953 during an epidemic outbreak  
37 in Tanzania [1]. Outbreaks of CHIKV occurred in the western Indian Ocean in 2005-6 [2], India  
38 and Italy in 2007 along with several Southeast Asian countries, Pacific regions and the Americas  
39 [3]. Similarly, ZIKV was first discovered in 1947 in a Ugandan forest [4]. The first sporadic ZIKV  
40 outbreaks outside Africa were reported in the Asia-Pacific region in 2007 [5] and 2013 [6], followed  
41 by its rapid spread to the Western hemisphere in 2016 [7], which received public attention due to the  
42 association of ZIKV infection with newborn microcephaly and other neurological abnormalities [8–11].  
43 Currently, no approved vaccine or therapeutic treatments exist to specifically target CHIKV or ZIKV  
44 infections. Disease prevention mostly relies on decreasing the number of transmission events through  
45 vector control strategies, presenting a significant challenge to limit the incidence of future epidemics,  
46 especially in developing countries.

47 Although CHIKV and ZIKV belong to distinct virus families (*Togaviridae* and *Flaviviridae*, re-  
48 spectively), virus particles share common characteristics, such as their positive single-stranded RNA  
49 genome and the presence of a lipid envelope derived from the host. Both viruses infect a wide spec-  
50 trum of mosquito and mammalian cell lines, including Vero cells, mosquito cells Aag2 or C6/36, as  
51 well as various human cell lines, including Huh7 [12, 13]. The classical kinetics following infection  
52 of a non-lytic virus begins with an eclipse phase in which attachment, entry and the first round of  
53 replication and assembly occurs. This period is followed by an exponential increase in viral particles  
54 released to the extracellular milieu following virus egress. Finally, a plateau phase is reached when  
55 the maximum capacity of virus production by the cells is reached. Following the plateau phase, the  
56 number of infectious virus particles in the extracellular milieu generally begins to decline due to a loss  
57 in stability and infectivity of the virions in the environment. Importantly, the time for each of these

58 phases of virus replication kinetics may vary between virus types, strains, and cell type, as the rate of  
59 different processes occurring in an infected cell (such as penetration, uncoating, replication, budding)  
60 may differ under different conditions.

61 Mathematical models of *in vitro* viral infections help elucidate the time scales of each of these  
62 phases and characteristics affecting virus-infected cells, such as the length of eclipse phase, or the  
63 mean lifespan of virus-releasing cells. Dynamical models provide accurate estimations of the rates that  
64 dictate the accumulation of virus in the free space outside of cells, such as viral genome production  
65 rates and loss of viral infectivity. The more precise quantification of such fundamental processes within  
66 virus-host interactions can better replace generic, experiment-specific, qualitative descriptions of virus  
67 replication (e.g., ‘attenuated growth’, ‘reduced fitness’ *in vitro*). These measures have been determined  
68 for a number of viruses, including HIV-1 and simian-human immunodeficiency virus (SHIV) [14–  
69 19], hepatitis C virus [20–24], poliovirus [25–27], influenza A virus and its variants [28–32], West  
70 Nile virus [33], and Ebola virus [34, 35]. The mathematical models proposed in these experimental  
71 studies rely on the assumption that infection of susceptible cells occurs via free infectious virus. In  
72 contrast, only a limited number of theoretical studies have considered infection of susceptible cells to  
73 be proportional to the total number of virus-producing cells, which is commonly referred to as the  
74 cell-to-cell transmission model. The latter type of modeling is important to consider, since cell-to-  
75 cell viral transmission has been observed to be an additional contributor to the infection for many  
76 enveloped viruses [36–38]. Indeed, some theoretical studies showed that cell-to-cell transmission of  
77 virus contributed approximately equally to the *in vitro* growth of equine infectious anaemia virus [39]  
78 and HIV-1 [40], explained multiplicity of (HIV-1)-infected splenocytes in humans [41], or permitted  
79 spread of HIV-1 virus despite antiretroviral therapy [42, 43]. Interestingly, while no direct evidence of  
80 cell-to-cell transmission of ZIKV exists to date, indirect evidence of cell-to-cell transmission of CHIKV  
81 was previously suggested to enable CHIKV resistance to antibody neutralization by bypassing the  
82 extracellular space [44, 45].

83 Modeling cell-to-cell transmission most commonly refers to modeling direct biological transfer of  
84 a virus. However, modeling cell-to-cell transmission may also be viewed as a proxy to model localized  
85 infections caused by low amounts of free infectious virus. This may especially be enhanced in static  
86 conditions, such as cell culture, where cell infections are more likely to occur in a localized manner as  
87 viral particles produced by an infected cell penetrate susceptible cells within their immediate neigh-  
88 borhood. In addition, such relatively low amounts of infectious virus responsible for new cell infections  
89 would be difficult to distinguish within the total infectious viral load especially for rapidly growing

90 viruses, such as CHIKV. Consequently, modeling occurrence of cell infections via total infectious viral  
91 load could result in misleading model parametrization. It is important to revise assumptions about  
92 viral infection dynamics as they could profoundly affect conclusions drawn from modeling *in vitro*  
93 virus dynamics under antiviral therapy, as the assays are often performed in adherent cell culture, as  
94 well as from modeling *in vivo* virus spread in organs and tissues.

95 In this study, we use viral dynamics modeling to numerically characterize the main determinants  
96 of ZIKV and CHIKV *in vitro* kinetics and to tease apart the effects of each determinant on the viral  
97 load. To inform the mathematical model, we measured temporal changes in the infectious viral titres  
98 and encapsulated genome abundances in a series of experiments reflective of different aspects of viral  
99 replication cycle in the extracellular milieu. To minimize the influence of immune responses on the  
100 CHIKV and ZIKV infection, we used a mammalian cell line (Vero) which is incapable of producing  
101 type I interferon in response to viral infections [46, 47]. Infection of Vero cells was carried out using  
102 two distinct amounts of input virus at multiplicity of infection (MOI, defined as the number of viral  
103 genomes that enter and effectively replicate in a cell) of 0.01 (hereafter referred to as low MOI) and  
104 1 (hereafter referred to as high MOI) of infectious virus per cell. Using mathematical modeling, we  
105 compared CHIKV and ZIKV infection kinetics by allowing new infections to be facilitated via free  
106 extracellular infectious virus (hereafter referred to as ‘standard’ model) or via virus-producing cells  
107 (hereafter referred to as cell-to-cell transmission model). We show that because CHIKV-infected cells  
108 exhibit a much shorter eclipse phase and rapid accumulation of virus during the initial growth phase  
109 compared to rather long eclipse phase of ZIKV-infected cells and slow accumulation of virus over the  
110 infection course, the standard model fails to describe temporal CHIKV viral load data. The cell-  
111 to-cell transmission model, in which virus spread occurs via virus-producing cells, transpired to be  
112 significantly more descriptive of both CHIKV and ZIKV viral load time course data. Overall, we  
113 deliver the first comprehensive numerical characterization of *in vitro* CHIKV and ZIKV infections.

## 114 Results

### 115 Quantification of chikungunya and Zika loss of infectivity $c$ and RNA genome sta- 116 bility $c_{\text{rna}}$ .

117 To precisely calculate the degradation rates of infectious virus  $c$  and RNA genomes  $c_{\text{rna}}$ , we exper-  
118 imentally measured stability of RNA genomes subjected to the physical conditions of the *in vitro*  
119 experiments. ZIKV and CHIKV stocks were incubated at 37°C for up to 72h in cell culture media and

120 at time points 8h, 48h and 72h, RNA was extracted and quantified by qRT-PCR. By fitting equation  
121 (1) to RNA genome abundances (see Material and Methods for description of the fitting procedure),  
122 we determined that CHIKV RNA genome degradation over the course of 72h was negligible (Figure  
123 1a) and for practical reasons was in the model (4) set to zero. ZIKV RNA genome degradation over  
124 the course of 72h was  $c_{\text{rna}} = 0.01\text{h}^{-1}$  (a half-life of 69.3h) (Figure 1b). Infectivity of both ZIKV and  
125 CHIKV were significantly reduced over time as determined by titration by plaque assay of infectious  
126 virus remaining in the solution (Figure 1a, 1b). By fitting equation (2) to viral titres (see Mate-  
127 rial and Methods for description of the fitting procedure), we determined the mean infectivity loss  
128 rate of CHIKV and ZIKV over the infection course to be  $c = 0.048\text{h}^{-1}$  and  $c = 0.072\text{h}^{-1}$ , respec-  
129 tively, (a half-life of 14.4h and 9.6h, respectively). In conclusion, ZIKV loses infectivity more rapidly  
130 than CHIKV. Estimated viral decay kinetic parameters for both ZIKV and CHIKV with their 95%  
131 confidence intervals are summarized in Table 1 and Figure 1.

## 132 Model selection

133 For each virus, we used Approximate Bayesian Computation (ABC, Materials and Methods) to fit  
134 equations (4) (see also Figure 2 for biological description of the equations) to low and high MOI exper-  
135 imental datasets separately and simultaneously. For each virus and each MOI dataset, we quantified  
136 viral parameters within the model (4) for both viral transmission modes. To determine which of the  
137 two transmission models provides better description of the data, we performed model selection based  
138 on the calculation of posterior odds ratio (Materials and Methods). We found strong evidence for  
139 the cell-to-cell viral transmission model to describe CHIKV infection dynamics as the posterior odds  
140 ratio was equal to one in favour of cell-to-cell viral transmission model. For ZIKV, we also found  
141 evidence for the cell-to-cell viral transmission model to describe infection dynamics with posterior  
142 odds ratio equal to 0.74 for the cell-to-cell viral transmission model compared to 0.26 for the standard  
143 transmission model. Solutions of the cell-to-cell transmission model associated with parameter sets  
144 inferred from ABC provided good fits to both CHIKV and ZIKV time course datasets (Figures 3a and  
145 4a, respectively). In contrast, solutions of the standard model associated with parameter sets inferred  
146 from ABC fit well ZIKV time course datasets (Figure 4b) and CHIKV time course datasets only when  
147 low and high MOI datasets were fit separately (results not shown) but did not fit well CHIKV time  
148 course datasets when low and high MOI datasets were fit simultaneously (Figure 3b).

149 Herein, we focus on the select model parameters, that is, eclipse phase  $\tau_E$ , viral genome production  
150 rate  $p$  and infectious virus to total RNA genomes ratio  $\alpha$ . For the remaining model parameters, namely

151 the number of compartments of eclipse and infectious phases  $n_E$  and  $n_I$ , respectively, the mean lifespan  
152 of infected cells  $\tau_I$  and the infection rate  $\beta$  the ABC converged on posterior distributions that were  
153 not significantly different from their uniform priors (results not shown). The mean, median and 95%  
154 credible intervals for all viral parameters for both models, both viruses and input MOI are listed in  
155 Tables 2, 3, 4 and 5.

156 **Duration of eclipse phase  $\tau_E$  of chikungunya- and Zika-infected cells is not exponential.**  
157 Inference process under standard model yielded posterior distributions of  $\tau_E$  with substantially differ-  
158 ent peaks and shapes for different initial experimental conditions (MOI) in the case of CHIKV infection  
159 (Figure 5a, left column). We estimated the median to be 14.6h for low MOI CHIKV infection, 6.3h  
160 for high MOI CHIKV infection and 9.3h if we fit the standard model to low and high MOI CHIKV  
161 datasets simultaneously. It is unlikely that differences in multiplicity of infection would promote such  
162 differences in posterior distributions of  $\tau_E$  as the time for a virion to complete its replication cycle is  
163 biologically rather predetermined. Inference process under cell-to-cell transmission model converged  
164 to posterior distributions with consistent shapes and peaks for different initial experimental conditions  
165 (MOI) for both CHIKV and ZIKV infections (Figures 5b, 5d, left column) yielding medians between  
166 6-7.5h and 36.4-39.8h, respectively. Interestingly, for ZIKV infection time course datasets, inference  
167 process under standard model yielded posterior distributions comparable to those under cell-to-cell  
168 transmission model (Figure 5c, left column) with the median between 36-38.8h across different initial  
169 viral input MOI. The mean, median and 95% credible intervals of the posterior distributions for the  
170 eclipse phase duration  $\tau_E$  for each virus, each transmission model and each initial MOI are listed in  
171 Tables 2, 3, 4 and 5.

172 **Viral genome production rate  $p$  and infectious virus to total RNA genomes ratio  $\alpha$  are**  
173 **substantially different for chikungunya and Zika viruses.** Posterior distributions of the viral  
174 genome production rate  $p$  exhibited substantial differences in the peaks and shapes when the standard  
175 model was fit to low and high MOI CHIKV experimental datasets (Figures 5a, middle column). We  
176 estimated the median to be 250, 2.6, and 70.6, viral genomes released out of a cell per hour. These  
177 discrepancies disappeared when CHIKV dynamics was described by the cell-to-cell viral transmission  
178 model (Figure 5b) yielding median between 1.9-2.4 viral genomes per hour across different initial  
179 viral input MOI. Inference of ZIKV genome production rate under both standard and cell-to-cell  
180 transmission models yielded a bounded posterior distribution of  $p$  of which median varied between  
181  $0.13\text{-}2.9 \times 10^6$  genomes released out of a cell per hour across different initial viral input MOI (Figures

182 5c and 5d, middle column). ZIKV-infected cells appeared to produce considerably more viral genomes  
183 but also significantly less infectious virus to total RNA genomes produced compared to CHIKV. For  
184 CHIKV, median of posterior distribution of  $\alpha$  varied between 3 to 5 infectious viruses per ten RNA  
185 genomes produced whereas for ZIKV we obtained 5.9-7.4 infectious viruses per ten thousand RNA  
186 genomes produced (Figure 5, right column in each panel). The mean, median and 95% credible  
187 intervals of the posterior distributions for the viral genome production rate  $p$  and infectious virus to  
188 total RNA genomes ratio  $\alpha$  for each virus, each transmission model and each initial MOI are listed in  
189 Tables 2, 3, 4 and 5.

### 190 **Viral parameters within cell-to-cell transmission model.**

191 We used the least-square fitting procedure described in Materials and Methods (Extraction of virus  
192 decay parameters) to precisely quantify the viral parameters by fitting the cell-to-cell transmission  
193 model (4) to low and high MOI datasets simultaneously. Because the number of compartments of the  
194 eclipse and infectious phases,  $n_E$  and  $n_I$ , respectively, could not be inferred, we set  $n_E = n_I = 40$   
195 (as e.g. used to estimate Influenza A *in vitro* kinetic parameters in [29]) and fit equations (4) to  
196 low and high MOI CHIKV and ZIKV datasets. The estimated best-fit parameter values and 95%  
197 bootstrap confidence intervals are listed in Table 6 and associated dynamics of CHIKV and ZIKV  
198 infections are depicted in Figure 7. The infection rate  $\beta_C$  was found to be  $\beta_C = 4.2 \times 10^{-3}$  and  
199  $3.5 \times 10^{-4} (\text{cells} \times \text{h})^{-1}$  for CHIKV and ZIKV infections, respectively. The duration of eclipse phase  
200 of CHIKV- and ZIKV-infected cells were found to be 6.4h and 29.4h, respectively. The mean lifespan  
201 of CHIKV- and ZIKV-producing cells were found to be 44.8h and 31.4h, respectively. Although the  
202 lifespan of virus-producing cells seems to be overestimated, especially in the case of CHIKV as it is  
203 highly cytopathic and promotes rapid cell death, such high values may be the result of post-peak  
204 virus clearance not having been captured in the data (Figures 7). As virus-producing cells undergo  
205 infection-induced death, additional data points capturing viral decay would reflect the phase when  
206 viral production becomes slower than viral clearance and possibly improve estimation of lifespan of  
207 virus-producing cells. The viral genome production rate  $p$  and infectious virus to total RNA genomes  
208 produced by a cell  $\alpha$  were found to be significantly different for both viruses. While production rate  
209 of CHIKV genomes was estimated to be 2.4 genomes per cell per hour with the proportion of 18  
210 infectious viruses per one hundred genomes, ZIKV genomes were being produced at the rate  $3.3 \times 10^4$   
211 genomes per cell per hour with the proportion of 6.3 infectious viruses per ten thousand genomes  
212 produced (Table 6).

## 213 Discussion

214 The present study investigated the *in vitro* dynamics of chikungunya (CHIKV) and Zika (ZIKV)  
215 viruses whose time course of viral load data showed significantly different replication cycle kinetics.  
216 In particular, a longer replication cycle of ZIKV compared to that of CHIKV gave rise to qualitatively  
217 distinct viral dynamics which we studied by mathematical modeling to tease apart and quantify  
218 individual drivers within each virus-cell interactions. The dynamics of extracellular free virus was  
219 found not to be descriptive of either CHIKV or ZIKV infection dynamics. Therefore, we hypothesized  
220 that the rate at which cells were infected was not proportional to the total extracellular infectious  
221 virus but rather the number of virus-producing cells.

222 In modeling the viral kinetics, we were able to evaluate which of the two transmission models, that  
223 is the standard model in which viral transmission is facilitated by extracellular free virus or cell-to-  
224 cell transmission model in which viral transmission is facilitated by virus-producing cells, can explain  
225 empirical observations. Although the dynamics of virus-producing cells transpired to be significantly  
226 more explanatory of viral kinetic data, we cannot establish the exact mechanisms responsible. The  
227 cell-to-cell transmission term ( $-\beta_C T \sum_j I_j$ ) in the mathematical model (4) represents two physical  
228 and generally distinct biological processes; first, utilization of existing cell-to-cell contacts by the virus  
229 and second, exploitation of cell adhesion biology to deliberately establish contact between infected  
230 and uninfected target cells. Biologically, much remains unknown about the possibility of ZIKV and  
231 CHIKV spread via direct cell-to-cell interactions. To date, evidence for such spread for ZIKV does not  
232 exist. On the other hand, cell-to-cell-transmission of CHIKV has been previously suggested to describe  
233 the resistance of CHIKV mutants to antibody-dependent neutralization [36]. The authors suggested  
234 that presumably cell-to-cell transmission occurs when virus budding occurs near a cell junction and  
235 when the virus can recognize the viral receptors on the neighboring cell. It is important to note  
236 that other ways of transmission, which may resemble cell-to-cell transmission in ‘protecting’ the virus  
237 from the extracellular space exist, and have not been taken into account in the latter study. For  
238 example, it is becoming increasingly evident that viruses hijack cellular machinery to be transmitted  
239 through extracellular vesicles (such as exosomes) in order to escape antibody and immune responses  
240 and mediating further infection [48–51]. Indeed, ZIKV transmission has been shown to be mediated  
241 by exosomes in cortical neurons [52]. In a similar manner, CHIKV was shown to trigger apoptosis  
242 and ‘hide’ in apoptotic blebs, which were then able to infect cells otherwise refractory to CHIKV  
243 infection [49]. Although direct cell-to-cell viral transmission remains to be experimentally explored



244 and demonstrated for CHIKV and ZIKV, we showed that mathematical model in which virus spread  
245 is proportional to virus-producing cells is able to explain experimental data more accurately. Despite  
246 that the spatial component of virus infection dynamics is not taken into account by either of the two  
247 models, a virus is most likely to infect neighboring cells following budding, especially in more static  
248 environments such as cell culture without mixing, or possibly in tissue compartments *in vivo*. This  
249 may explain why the cell-to-cell transmission model is favored in this study, as the extracellular free  
250 virus model, which assumes that progeny virus is likely to infect any cell, irrespective of the distance  
251 from the infected cell.

252 It is important to note that most empirical data used for modeling tend to be generated under a  
253 single growth condition. We conscientiously chose to perform and analyze both low and high MOI  
254 growth, individually and combined, to further test the validity of each model. Had only one growth  
255 condition been selected, we would not have identified that the standard model failed. These results  
256 argue for the inclusion of more diverse experimental sets in model selection and development. We  
257 could argue that the extreme differences between the inferred posterior distributions of CHIKV viral  
258 parameter values under free-virus transmission may have been the result of MOI-dependent cellular  
259 response to the presence of the virus throughout the infection course. Another possible explanation  
260 for the reported discrepancies is superinfection. However, CHIKV superinfection is not well supported  
261 since it has recently been shown that prior CHIKV infection of BHK cells (which are also interferon-  
262 incompetent) inhibits re-infection of already infected cells by a challenge CHIKV [53]. Modeling  
263 CHIKV *in vitro* dynamics thus presents a challenge and requires further investigation.

264 Statistical model comparison provided more support for cell-to-cell over the standard viral trans-  
265 mission model. Nevertheless, this does not imply that cell-to-cell transmission model is the correct  
266 model to be used to model CHIKV *in vitro* dynamics. To possibly test the hypothesis that standard  
267 transmission model is indeed descriptive of CHIKV kinetics, infectious and total RNA genomes would  
268 have to be measured in a timely manner in-between time points 8h and 24h to capture two-phase in-  
269 crease of virus, particularly at low MOI. Insufficient data may have not provided enough information  
270 about the viral dynamics to the mathematical model. Genome quantification of intracellular virus  
271 would provide evidence for differential accumulation of virus within cells during low and high MOI  
272 infection. Another, although indirect, evidence to support the standard model would include timely  
273 measures of cell death as their accumulation would reflect removal of short-lived virus producing cells  
274 with a large viral burst size from the system. Interestingly, both standard and cell-to-cell transmission  
275 models were able to describe ZIKV *in vitro* kinetics. Although there was stronger statistical preference

276 for the latter, inference process yielded comparable posterior distributions of viral parameter values  
277 for both standard and cell-to-cell transmission models. Thus, we conclude that CHIKV as a model  
278 virus with fast replication cycle may exhibit MOI-dependent phenotypes.

279 Overall, this study showed that the mathematical model in which the spread of an infection is  
280 described by cell-to-cell viral transmission can more accurately describe the *in vitro* dynamics of  
281 CHIKV and ZIKV infections than the standard model in which the spread of an infection is mediated  
282 via free extracellular virus. By modeling viral load datasets reflective of the virus kinetics at low and  
283 high MOI, we quantified the rates of different processes within the CHIKV- and ZIKV-cell interactions.  
284 Although we could not directly identify and quantify specific mechanisms, differences in the time scales  
285 of viral replication cycle may play an important role in identifying the model of better predictive power.  
286 This could have a significant impact on the development of models for viral control as the predictive  
287 ability of a chosen model to reflect and meaningfully interpret viral data under the influence of an  
288 external intervention, such as antiviral treatment, would be skewed. Identifying descriptive models  
289 and confronting them with diverse experimental datasets is essential to the development of therapies  
290 that prevent or treat CHIKV, ZIKV, and other infections.

## 291 **Materials and Methods**

292 **Cells** Vero, HEK-293T and BHK cells were maintained in Dulbecco's modified Eagles medium  
293 (DMEM), supplemented with 10% fetal calf serum (FCS) and 1% penicillin/streptomycin (P/S;  
294 Thermo Fisher) in a humidified atmosphere at 37°C with 5% CO<sub>2</sub>. U4.4 cells (derived from *Aedes*  
295 *albopictus*) were grown in Leibovitz's L-15 medium with 10% FCS, supplemented with 1% P/S, 1%  
296 non-essential amino acids (Sigma) and 1% tryptose phosphate (Sigma) at 28°C.

297 **Viruses** The chikungunya virus (CHIKV) stock was generated from a Caribbean infectious clone  
298 described elsewhere [54]. After linearization with *NotI* restriction enzyme (Thermo Fisher), RNA  
299 was generated by *in vitro* transcription (IVT) with SP6 mMESSAGE mMACHINE kit (Invitrogen)  
300 and transfected into BHK with lipofectamin 2000 (invitrogen). The Zika virus (ZIKV) used for this  
301 study is the prototype african MR-766 strain derived from an infectious clone described elsewhere  
302 [55]. ZIKV was rescued by transfection of the infectious clone in semi-confluent HEK-293T cells using  
303 TransIT-LT1 transfection reagent (Mirus Bio). For both viruses, virus stocks used in this study were  
304 generated by infection of Vero cells for amplification, titred by plaque assay and frozen at -80°C prior  
305 to use.

306 **Plaque assay** Viral titration was performed on Vero cells plated 1 day prior to infection on 24 well  
307 plates. Ten fold dilutions were performed in DMEM alone and transferred onto Vero cells for 1 hour  
308 to allow infection before adding DMEM with 2% FCS, 1% P/S and 0.8% agarose. Plaque assays  
309 were fixed with 4% formalin (Sigma) 3 days post infection (p.i.) (CHIKV) or 4 days p.i. (ZIKV) and  
310 plaques were manually counted.

311 **Growth curves** Cells were plated in 12 well plates at 80-90% confluence one day before infection.  
312 At day 0, virus was diluted in 300 or 200  $\mu$ l PBS to obtain a multiplicity of infection (MOI) of 1 PFU  
313 per cell (high MOI) or 0.01 PFU per cell (low MOI). After 1 hour, the viral solution was removed,  
314 cells were washed three times with PBS and new media supplemented with 2% FCS was added. At  
315 each time point 0h, 4h, 8h, 24h, 48h and 72h for CHIKV and 0h, 4h, 6h, 8h, 24h, 48h, 72h, and 96h for  
316 ZIKV infection 60  $\mu$ l and 5  $\mu$ l were separately aliquoted and frozen for further titration (as described  
317 above) and RT qPCR. 65  $\mu$ l of fresh media was added on top of cells to replace the taken volume.  
318 Each growth curve was done in triplicates.

319 **RT qPCR** As described in [56], cell supernatants were heated 5 minutes at 60°C for viral inacti-  
320 vation. Quantitative RT-PCR was then performed with TaqMan RNA-to-Ct One-step RT-PCR kit  
321 (Applied Biosystems) using the following cycling conditions: 20 minutes at 50 C, 10 minutes at 95  
322 C, 40 cycles of 95 C for 15 seconds, followed by 60 C for 1 minute). The primer and probe sets used  
323 for each virus are shown in Table 7. RNA copy number was derived from a standard curve generated  
324 using reactions containing 10-fold dilutions of known amounts of in vitro generated RNA transcripts  
325 Each reaction contained a scale of diluted IVT to calculate RNA copy number. The CHIKV RT-PCR  
326 amplifies a 152 nucleotide-region spanning the 5' UTR and NSP1. The ZIKV primers bind to and  
327 amplify a 77 nucleotide region in the 5' end of the ZIKV genome (position 1192-1268).

328 **Extraction of virus decay parameters** To identify viral decay parameters,  $c_{\text{rna}}$  and  $c$ , we assumed  
329 that the loss of RNA genomes and infectious virus proceeds in an exponential (or log-linear) manner  
330 over time. Therefore, the loss of RNA genomes  $V_{\text{rna}}(t)$  and infectious virus  $V_{\text{pfu}}(t)$  can be expressed as

$$\ln V_{\text{rna}}(t) = \ln V_{\text{rna}}(0) - c_{\text{rna}} t, \quad (1)$$

$$\ln V_{\text{pfu}}(t) = \ln V_{\text{pfu}}(0) - c_{\text{pfu}} t, \quad (2)$$

331 where  $c_{\text{rna}}$  and  $c_{\text{pfu}}$  (measured in  $\text{h}^{-1}$ ) are the decay rates of RNA genomes and virus infectivity,  
332 respectively, as in equations (4), and  $\ln V_{\text{rna}}(0)$  and  $\ln V_{\text{pfu}}(0)$  are natural logarithms of the initial  
333 states of RNA genomes and infectious virus at  $t = 0\text{h}$ .

334 To obtain estimates of viral decay parameters, we minimized the sum of squared errors (SSE)  
335 between the measured data  $D(t_i)$  and the model solution  $V(t_i)$  at each measured time point  $t_i$  and  
336 for each measured replicate  $j$  given as

$$\text{SSE}(V, D) = \sum_i \sum_j (V(t_i) - D(t_i))^2 \quad (3)$$

337 across parameter ranges using the Python function `scipy.optimize.least_squares` for performing  
338 bound-constrained optimization on variables. To provide 95% confidence intervals for each estimated  
339 best-fit parameter, we fit equations (1) and (2) to 3000 bootstrap replicates of each data set, the  
340 detailed description of which can be found in [59].

341 **Mathematical model** The cell-free, low and high MOI time course datasets were numerically sim-  
342 ulated using a collection of ordinary differential equations, in which susceptible target cells ( $T$ ) become  
343 infected by infectious virus ( $V_{\text{pfu}}$ ), measured in plaque forming units (PFU) or virus-producing cells  
344 ( $I_{j=1\dots n_I}$ ) at the infection rate ( $\beta_V$ ), (measured in  $(\text{PFU} \times \text{h})^{-1}$ ) or ( $\beta_I$ ), (measured in  $(\text{cell} \times \text{h})^{-1}$ ),  
345 respectively. The rate of cell infection by infectious virus depends on the concentration of free extra-  
346 cellular infectious virus ( $V_{\text{pfu}}$ ), but not released total virus ( $V_{\text{rna}}$ ), measured as total RNA genomes  
347 (RNA). Upon successful infection, target cells enter an eclipse phase (the time between virus entry  
348 into the cell to the beginning of viral release out of the cell), separated into ( $n_E$ ) stages. Eclipse  
349 cells ( $E_{i=1,\dots,n_E}$ ) remain in each stage  $i = 1, \dots, n_E$  for an exponentially-distributed time of equal  
350 average length ( $\tau_E/n_E$ ). Only eclipse cells in the last compartment ( $E_{n_E}$ ) are allowed to transition  
351 into the infectious state and begin producing viral genomes. Infectious phase (the amount of time  
352 between the beginning of viral release out of a cell until the cell undergoes cell death or is removed  
353 from the state of being infectious by other mechanisms) is separated into ( $n_I$ ) stages, and infectious  
354 cells ( $I_{j=1,\dots,n_I}$ ) spend an exponentially-distributed time of equal average length ( $\tau_E/n_E$ ) in each stage  
355 before infectious cells in the last stage ( $n_I$ ) are removed from the system. It is unrealistic to impose  
356 the assumption on the cells to spend an exponentially distributed amount of time in the eclipse or  
357 infectious phases (here equivalent to  $n_E = n_I = 1$ ) as it would allow cells to initiate viral production  
358 immediately upon infection, stop viral production immediately after it is initiated, and produce virus  
359 indefinitely [19, 18, 30, 31, 57]. Therefore, we subdivided eclipse and infectious phases into  $n_E$  and

360  $n_I$  compartments, such that these times are Erlang distributed with means  $\tau_E$  and  $\tau_I$ , respectively.  
 361 Erlang distribution is a special case of Gamma distribution of which the shape is dictated by  $n_E$  and  
 362  $n_I$  and vary from an exponential ( $= 1$ ) to a normal-like ( $\gg 1$ ) (Figure 6). Infectious cells in all stages  
 363 can produce viral genomes at the rate ( $p$ ), measured in  $\text{RNA} \times (\text{cell} \times \text{h})^{-1}$ , the proportion of which  
 364 ( $\alpha$ ), measured in  $\text{PFU}/\text{RNA}$  translates into infectious virus. Viral particles degrade at the rate  
 365 ( $c_{\text{rna}}$ ), measured in  $\text{h}^{-1}$  and infectious virus loses infectivity at the rate ( $c$ ), measured in  $\text{h}^{-1}$ . The  
 366 viral dynamics model is illustrated in Figure 2 and comprises of the following collection of ordinary  
 367 differential equations:

$$\begin{aligned}
 \frac{dT}{dt} &= -\beta(V_{\text{pfu}}, I_1, \dots, I_{n_I}) T \\
 \frac{dE_1}{dt} &= \beta T V_{\text{pfu}} - \frac{n_E}{\tau_E} E_1 \\
 \frac{dE_{i=2\dots n_E}}{dt} &= \frac{n_E}{\tau_E} E_{i-1} - \frac{n_E}{\tau_E} E_i \\
 \frac{dI_1}{dt} &= \frac{n_E}{\tau_E} E_{n_E} - \frac{n_I}{\tau_I} I_1 \\
 \frac{dI_{j=2\dots n_I}}{dt} &= \frac{n_I}{\tau_I} I_{j-1} - \frac{n_I}{\tau_I} I_j \\
 \frac{dV_{\text{pfu}}}{dt} &= \alpha p \sum_{j=1}^{n_I} I_j - (c + c_{\text{rna}}) V_{\text{pfu}} \\
 \frac{dV_{\text{rna}}}{dt} &= p \sum_{j=1}^{n_I} I_j - c_{\text{rna}} V_{\text{rna}}
 \end{aligned} \tag{4}$$

368 where

$$\beta(V_{\text{pfu}}, I_1, \dots, I_{n_I}) = \begin{cases} \beta_V V_{\text{pfu}} & \text{in case of free-virus transmission} \\ \beta_I \sum_{j=1}^{n_I} I_j & \text{in case of cell-to-cell transmission.} \end{cases}$$

369 The experiments to obtain viral load data at different time points began with overlaying the  
 370 virus supernatant on susceptible cells followed by a one hour cultivation to allow cell infection. The  
 371 supernatant was then removed and cells were thoroughly washed off the remaining virus that did  
 372 not enter the cells. The proportion of susceptible cells that became infected was governed by the  
 373 multiplicity of infection (i.e., the ratio of infectious virus in the inoculum to the total number of  
 374 susceptible cells) and was assumed to follow Poisson distribution as follows:

$$\text{Proportion of cells receiving } N \text{ viral particles} = \frac{\text{MOI}^N \exp(-\text{MOI})}{N!}. \tag{5}$$

375 We further simplify the process by allowing only eclipse cells in their first stage of eclipse phase,  $E_1$ ,  
 376 to have received the virus. The fraction of  $E_1$  cells which received one or more viruses is equivalent

377 to the total proportion of cells excluding those which did not receive any virus

$$\text{Proportion of } E_1 \text{ cells} = 1 - \frac{\text{MOI}^0 \exp(-\text{MOI})}{0!} = 1 - \exp(-\text{MOI}). \quad (6)$$

378 Thus, the initial conditions are  $T(t = 0) = T_0 \times \exp(-\text{MOI})$ ,  $E_1(t = 0) = T_0 \times (1 - \exp(-\text{MOI}))$ ,  
 379  $E_{2,\dots,n_E}(t = 0) = 0$ ,  $I_{1,\dots,n_I}(t = 0) = 0$ ,  $V_{\text{pfu}}(t = 0) = 0$ , and  $V_{\text{rna}}(t = 0) = 0$ , where  $T_0 = 2 \times 10^5$   
 380 susceptible cells seeded in each well.

381 **Parameter inference** We used Approximate Bayesian Computation (ABC) rejection approach to  
 382 infer viral parameters and perform model selection. We simulated large numbers of datasets using  
 383 parametrisations sampled from a log-uniform prior probability distribution for each model parameter.  
 384 Specifically, the ranges over which we varied both CHIKV and ZIKV parameters were  $n_E \sim U(1, 40)$ ,  
 385  $n_I \sim U(1, 40)$ ,  $\log_{10} \beta_V \sim U(-10, c/T_0)$ ,  $\log_{10} \beta_C \sim U(-6, -1)$ ,  $\log_{10} \tau_E \sim U(-1, 2)$  and  $\log_{10} \tau_I \sim$   
 386  $U(-1, 3)$ . CHIKV-specific parameter ranges were within  $\log_{10} p \sim U(0, 6)$ ,  $\log_{10} \alpha \sim U(-2, 0)$  and  
 387 ZIKV-specific parameter ranges were within  $\log_{10} p \sim U(2, 8)$ ,  $\log_{10} \alpha \sim U(-5, 0)$ . At the time  
 388 point  $t = 0$ h, the extracellular virus was either undetectable or some residual virus was detected due  
 389 to insufficient washing of cells. Thus, we keep the initial residual extracellular viral loads as free  
 390 parameters and do not allow the residual virus to engage in the dynamics (residual infectious virus  
 391 and RNA genomes are only allow to decay at the rates  $c$  and  $c_{\text{rna}}$ , respectively). The initial CHIKV  
 392 residual inputs were varied within  $\log_{10} V_{\text{pfu}}(0) \sim U(0, 2)$ ,  $\log_{10} V_{\text{rna}}(0) \sim U(0, 3)$  for low MOI infection  
 393 and  $\log_{10} V_{\text{pfu}}(0) \sim U(2.5, 3.5)$  and  $\log_{10} V_{\text{rna}}(0) \sim U(2.5, 3.5)$  for high MOI infection. The initial  
 394 ZIKV residual inputs were varied within  $\log_{10} V_{\text{pfu}}(0) \sim U(1.5, 2.5)$ ,  $\log_{10} V_{\text{rna}}(0) \sim U(2.5, 5.5)$  for low  
 395 MOI infection and  $\log_{10} V_{\text{pfu}}(0) \sim U(3, 4.5)$  and  $\log_{10} V_{\text{rna}}(0) \sim U(4, 7.5)$  for high MOI infection. We  
 396 numerically solved the system (4) using the Python function `scipy.integrate.odeint` and simulated  
 397 data  $V_{\text{pfu}}$  and  $V_{\text{rna}}$  were then compared with the mean of measured data  $D_{\text{pfu}}$  and  $D_{\text{rna}}$  by calculating  
 398 Euclidean distance

$$\text{dist}(V_{\text{pfu}}, V_{\text{rna}}, D_{\text{pfu}}, D_{\text{rna}}) = \sqrt{\sum_{i=1}^N \left[ \left( \frac{V_{\text{pfu}}(t_i) - D_{\text{pfu}}(t_i)}{S_{D_{\text{pfu}}(t_i)}} \right)^2 + \left( \frac{V_{\text{rna}}(t_i) - D_{\text{rna}}(t_i)}{S_{D_{\text{rna}}(t_i)}} \right)^2 \right]} \quad (7)$$

399 for measured times  $\{t_i | i = 1, \dots, N\}$  where  $S_{D_{\text{pfu}}(t_i)}$  and  $S_{D_{\text{rna}}(t_i)}$  are the standard deviations of the  
 400 measured viral titres and RNA genome abundances at the time point  $t_i$ . The parametrizations of  
 401 all simulated datasets were sorted with respect to the distance (7) in an ascending manner and the

402 first one thousand parametrizations were accepted. The posterior density distributions were then  
403 constructed from the pool of accepted parametrizations.

404 **Model selection** We evaluate the evidence provided by the data in favour of cell-to-cell transmis-  
405 sion model over the standard model by computing posterior odds as a summary of such evidence.  
406 Practically, for each of the models we find the largest distance (7) at which a parameter set was ac-  
407 cepted. Using the smaller of these two distances, we can then determine for each model the number  
408 of parameter sets that would be accepted at this threshold. The posterior odds are then the fraction  
409 of all parameter sets accepted at this threshold contributed by each model.

410 **Biological constraints** We impose realistic biological constraints on the viral parameters whenever  
411 the spread of infection is modelled by free-virus transmission. Since infectious virus is cleared at a rate  
412  $c$ , then its mean lifetime is  $1/c$ . Therefore, the mean number of cells infectious virus infects during  
413 its lifetime is  $\beta_V T_0/c$ . We require that inferred viral parameters satisfy  $\beta_V T_0/c \leq 1$  and thus, on  
414 average, infectious virus can infect at most one cell.

415 Since we initiate equations (4) at time 0h assuming a portion of cells already in the eclipse phase,  
416 any combination of viral parameters will result in viral growth. To ensure realistic parametrization  
417 of equations (4), we required the basic reproduction number  $R_0$ , defined as the number of secondary  
418 infected cells that will be infected by a single infectious cell in a completely susceptible population is  
419 at least one, to satisfy  $R_0 = \beta_V T_0 \tau_I \alpha p/c \geq 1$ .  $R_0$  is here a product of the mean amount of infectious  
420 virus produced during the lifetime of an infected cell ( $\alpha p \tau_I$ ) and the mean number of cells infected  
421 per infectious virus  $\beta_V T_0/c$  [58].

## 422 Acknowledgements

423 We thank Carolina B. López and the members of Vignuzzi lab for discussions. This work was funded by  
424 the DARPA INTERCEPT program managed by Dr. Jim Gimlett and administered through DARPA  
425 Cooperative Agreement #HR0011-17-2-0023 (the content of the information does not necessarily re-  
426 flect the position or the policy of the U.S. government, and no official endorsement should be inferred).

## 427 References

- 428 [1] Robinson MC. An epidemic of virus disease in Southern Province, Tanganyika territory, in  
429 1952-1953. 1955. Transactions of the Royal Society of Tropical Medicine and Hygiene 49(1):28-  
430 32.
- 431 [2] Schuffenecker I, Iteman I, Michault A, Murri S, Frangeul L, Vaney MC, Lavenir R, Pardigon  
432 N, Reynes JM, Pettinelli F, Biscornet L. 2006. Genome microevolution of chikungunya viruses  
433 causing the Indian Ocean outbreak. PLoS Medicine 3(7):e263.
- 434 [3] Chen R, Puri V, Fedorova N, Lin D, Hari KL, Jain R, Rodas JD, Das SR, Shabman RS, Weaver  
435 SC. 2016. Comprehensive genome scale phylogenetic study provides new insights on the global  
436 expansion of chikungunya virus. Journal of Virology 90(23):10600-11.
- 437 [4] Dick GW, Kitchen SF, Haddow AJ. Zika virus (I). 1952. Isolations and serological specificity.  
438 Transactions of the Royal Society of Tropical Medicine and Hygiene 46(5):509-20.
- 439 [5] Lanciotti RS, Kosoy OL, Laven JJ, Velez JO, Lambert AJ, Johnson AJ, Stanfield SM, Duffy  
440 MR. 2008. Genetic and serologic properties of Zika virus associated with an epidemic, Yap State,  
441 Micronesia, 2007. Emerging Infectious Diseases 14(8):1232.
- 442 [6] Oehler E, Watrin L, Larre P, Leparac-Goffart I, Lastere S, Valour F, Baudouin L, Mallet HP,  
443 Musso D, Ghawche F. 2014. Zika virus infection complicated by Guillain-Barre syndrome case  
444 report, French Polynesia, December 2013. Eurosurveillance 19(9):20720.
- 445 [7] Dyer O. Zika virus spreads across Americas as concerns mount over birth defects. 2015. BMJ  
446 351:h6983.
- 447 [8] Parra B, Lizarazo J, Jiménez-Arango JA, Zea-Vera AF, González-Manrique G, Vargas J, An-  
448 garita JA, Zuñiga G, Lopez-Gonzalez R, Beltran CL, Rizcala KH. 2016. GuillainBarré syndrome  
449 associated with Zika virus infection in Colombia. New England Journal of Medicine 375(16):1513-  
450 23.
- 451 [9] Mlakar J, Korva M, Tul N, Popović M, Poljšak-Prijatelj M, Mraz J, Kolenc M, Resman Rus  
452 K, Vesnaver Vipotnik T, Fabjan Vodusek V, Vizjak A. 2016. Zika virus associated with micro-  
453 cephalo. New England Journal of Medicine 374(10):951-8.
- 454 [10] European Centre for Disease Prevention and Control. Rapid risk assessment: Zika virus epidemic  
455 in the Americas: potential association with microcephaly and Guillain-Barré syndrome. 2015.



- 456 [11] Ioos S, Mallet HP, Goffart IL, Gauthier V, Cardoso T, Herida M. Current Zika virus epidemiology  
457 and recent epidemics. 2014. *Medecine et Maladies Infectieuses* 44(7):302-7.
- 458 [12] Weger-Lucarelli J, Ruckert C, Chotiwan N, Nguyen C, Luna SM, Fauver JR, Foy BD, Perera R,  
459 Black WC, Kading RC, Ebel GD. 2016. Vector competence of American mosquitoes for three  
460 strains of Zika virus. *PLoS Neglected Tropical Diseases* 10(10):e0005101.
- 461 [13] Moser LA, Boylan BT, Moreira FR, Myers LJ, Svenson EL, Fedorova NB, Pickett BE, Bernard  
462 KA. Growth and adaptation of Zika virus in mammalian and mosquito cells. 2018. *PLoS Ne-*  
463 *glected Tropical Diseases* 12(11):e0006880.
- 464 [14] Perelson AS, Ribeiro RM. 2013. Modeling the within-host dynamics of HIV infection. *BMC*  
465 *Biology* 11(1):96.
- 466 [15] Wu H, Zhu H, Miao H, Perelson AS. Parameter identifiability and estimation of HIV/AIDS  
467 dynamic models. 2008. *Bulletin of Mathematical Biology* 70(3):785-99.
- 468 [16] Verotta D. 2005. Models and estimation methods for clinical HIV-1 data. *Journal of Computa-*  
469 *tional and Applied Mathematics* 184(1):275-300.
- 470 [17] Miao H, Dykes C, Demeter LM, Cavanaugh J, Park SY, Perelson AS, Wu H. 2008. Modeling  
471 and estimation of kinetic parameters and replicative fitness of HIV-1 from flow-cytometry-based  
472 growth competition experiments. *Bulletin of Mathematical Biology* 70(6):1749-71.
- 473 [18] Kakizoe Y, Nakaoka S, Beauchemin CA, Morita S, Mori H, Igarashi T, Aihara K, Miura T,  
474 Iwami S. 2015. A method to determine the duration of the eclipse phase for in vitro infection  
475 with a highly pathogenic SHIV strain. *Scientific Reports* 5:10371.
- 476 [19] Beauchemin CA, Miura T, Iwami S. 2017. Duration of SHIV production by infected cells is  
477 not exponentially distributed: Implications for estimates of infection parameters and antiviral  
478 efficacy. *Scientific Reports* 7:42765.
- 479 [20] Chatterjee A, Guedj J, Perelson AS. 2012. Mathematical modeling of HCV infection: what can  
480 it teach us in the era of direct antiviral agents?. *Antiviral Therapy* 17(6 0 0):1171.
- 481 [21] Aston P. 2018. A new model for the dynamics of hepatitis C infection: Derivation, analysis and  
482 implications. *Viruses* 10(4):195.

- 483 [22] Rihan FA, Sheek-Hussein M, Tridane A, Yafia R. 2017. Dynamics of hepatitis C virus infection:  
484 mathematical modeling and parameter estimation. *Mathematical Modeling of Natural Phenom-  
485 ena* 12(5):33-47.
- 486 [23] Arthur JG, Tran HT, Aston P. Feasibility of parameter estimation in hepatitis C viral dynamics  
487 models. 2017. *Journal of Inverse and Ill-Posed Problems* 25(1):69-80.
- 488 [24] Perelson AS, Ribeiro RM. 2008. Estimating drug efficacy and viral dynamic parameters: HIV  
489 and HCV. *Statistics in medicine* 27(23):4647-57.
- 490 [25] Krakauer DC, Komarova NL. 2003. Levels of selection in positivestrand virus dynamics. *Journal  
491 of evolutionary biology* 16(1):64-73.
- 492 [26] Regoes RR, Crotty S, Antia R, Tanaka MM. 2005. Optimal replication of poliovirus within cells.  
493 *The American Naturalist* 165(3):364-73.
- 494 [27] Schulte MB, Draghi JA, Plotkin JB, Andino R. 2015. Experimentally guided models reveal  
495 replication principles that shape the mutation distribution of RNA viruses. *Elife* 4:e03753.
- 496 [28] Boianelli A, Nguyen V, Ebensen T, Schulze K, Wilk E, Sharma N, Stegemann-Koniszewski S,  
497 Bruder D, Toapanta F, Guzmán C, Meyer-Hermann M. 2015. Modeling influenza virus infection:  
498 a roadmap for influenza research. *Viruses* 7(10):5274-304.
- 499 [29] Pinilla LT, Holder BP, Abed Y, Boivin G, Beauchemin CA. 2012. The H275Y neuraminidase  
500 mutation of the pandemic A/H1N1 influenza virus lengthens the eclipse phase and reduces  
501 viral output of infected cells, potentially compromising fitness in ferrets. *Journal of Virology*  
502 86(19):10651-60.
- 503 [30] Holder BP, Beauchemin CA. 2011. Exploring the effect of biological delays in kinetic models of  
504 influenza within a host or cell culture. *BMC Public Health* 11(1):S10.
- 505 [31] Holder BP, Liao LE, Simon P, Boivin G, Beauchemin CA. 2011. Design considerations in building  
506 in silico equivalents of common experimental influenza virus assays. *Autoimmunity* 44(4):282-93.
- 507 [32] Paradis EG, Pinilla LT, Holder BP, Abed Y, Boivin G, Beauchemin CA. 2015. Impact of the  
508 H275Y and I223V mutations in the neuraminidase of the 2009 pandemic influenza virus in vitro  
509 and evaluating experimental reproducibility. *PLoS One* 10(5):e0126115.

- 510 [33] Banerjee S, Guedj J, Ribeiro RM, Moses M, Perelson AS. 2016. Estimating biologically relevant  
511 parameters under uncertainty for experimental within-host murine West Nile virus infection.  
512 *Journal of the Royal Society Interface* 13(117):20160130.
- 513 [34] Nguyen VK, Binder SC, Boianelli A, Meyer-Hermann M, Hernandez-Vargas EA. 2015. Ebola  
514 virus infection modeling and identifiability problems. *Frontiers in Microbiology* 6:257.
- 515 [35] Nguyen VK, Hernandez-Vargas EA. 2017. Windows of opportunity for Ebola virus infection  
516 treatment and vaccination. *Scientific reports* 7(1):8975.
- 517 [36] Malbec M, Porrot F, Rua R, Horwitz J, Klein F, Halper-Stromberg A, Scheid JF, Eden C,  
518 Mouquet H, Nussenzweig MC, Schwartz O. 2013. Broadly neutralizing antibodies that inhibit  
519 HIV-1 cell to cell transmission. *Journal of Experimental Medicine* 210(13):2813-21.
- 520 [37] Mateo M, Generous A, Sinn PL, Cattaneo R. 2015. Connections matter how viruses use cellcell  
521 adhesion components. *Journal Cell Science* 128(3):431-9.
- 522 [38] Xu Z, Waeckerlin R, Urbanowski MD, Van Marle G, Hobman TC. 2012. West Nile virus in-  
523 fection causes endocytosis of a specific subset of tight junction membrane proteins. *PloS One*  
524 7(5):e37886.
- 525 [39] Komarova NL, Anghelina D, Voznesensky I, Trinit B, Levy DN, Wodarz D. 2013. Relative  
526 contribution of free-virus and synaptic transmission to the spread of HIV-1 through target cell  
527 populations. *Biology Letters* 9(1):20121049.
- 528 [40] Iwami S, Takeuchi JS, Nakaoka S, Mammano F, Clavel F, Inaba H, Kobayashi T, Misawa N,  
529 Aihara K, Koyanagi Y, Sato K. 2015. Cell-to-cell infection by HIV contributes over half of virus  
530 infection. *Elife* 4:e08150.
- 531 [41] Dixit NM, Perelson AS. 2004. Multiplicity of human immunodeficiency virus infections in lym-  
532 phoid tissue. *Journal of Virology* 78(16):8942-5.
- 533 [42] Sigal A, Kim JT, Balazs AB, Dekel E, Mayo A, Milo R, Baltimore D. 2011. Cell-to-cell spread  
534 of HIV permits ongoing replication despite antiretroviral therapy. *Nature* 477(7362):95.
- 535 [43] Komarova NL, Levy DN, Wodarz D. 2013. Synaptic transmission and the susceptibility of HIV  
536 infection to anti-viral drugs. *Scientific Reports* 3:2103.

- 537 [44] Lee CY, Kam YW, Fric J, Malleret B, Koh EG, Prakash C, Huang W, Lee WW, Lin C, Lin RT,  
538 Renia L. 2011. Chikungunya virus neutralization antigens and direct cell-to-cell transmission are  
539 revealed by human antibody-escape mutants. *PLoS Pathogens* 7(12):e1002390.
- 540 [45] Porta J, Prasad VM, Wang CI, Akahata W, Ng LF, Rossmann MG. 2016. Structural studies of  
541 chikungunya virus-like particles complexed with human antibodies: neutralization and cell-to-  
542 cell transmission. *Journal of Virology* 90(3):1169-77.
- 543 [46] Desmyter J, Melnick JL, Rawls WE. 1968. Defectiveness of interferon production and of rubella  
544 virus interference in a line of African green monkey kidney cells (Vero). *Journal of Virology*  
545 2(10):955-61.
- 546 [47] Osada N, Kohara A, Yamaji T, Hirayama N, Kasai F, Sekizuka T, Kuroda M, Hanada K. 2014.  
547 The genome landscape of the African green monkey kidney-derived Vero cell line. *DNA Research*  
548 21(6):673-83.
- 549 [48] Martins SD, Kuczera D, Ltvall J, Bordignon J, Alves LR. 2018. Characterization of dendritic  
550 cell-derived extracellular vesicles during dengue virus infection. *Frontiers in Microbiology* 9.
- 551 [49] Krejbich-Trotot P, Denizot M, Hoarau JJ, Jaffar-Bandjee MC, Das T, Gasque P. 2011. Chikun-  
552 gunya virus mobilizes the apoptotic machinery to invade host cell defenses. *The FASEB Journal*  
553 25(1):314-25.
- 554 [50] Ramakrishnaiah V, Thumann C, Fofana I, Habersetzer F, Pan Q, de Ruyter PE, Willemsen  
555 R, Demmers JA, Raj VS, Jenster G, Kwekkeboom J. 2013. Exosome-mediated transmission of  
556 hepatitis C virus between human hepatoma Huh7. 5 cells. *Proceedings of the National Academy*  
557 *of Sciences* 110(32):13109-13.
- 558 [51] Zhang W, Jiang X, Bao J, Wang Y, Liu H, Tang L. 2018. Exosomes in pathogen infections: a  
559 bridge to deliver molecules and link functions. *Frontiers in Immunology* 12;9:90.
- 560 [52] Zhou W, Woodson M, Sherman MB, Neelakanta G, Sultana H. 2019. Exosomes mediate Zika  
561 virus transmission through SMPD3 neutral Sphingomyelinase in cortical neurons. *Emerging*  
562 *Microbes & Infections* 8(1):307-26.
- 563 [53] Boussier J. 2018. Chikungunya virus superinfection exclusion and defective viral genomes: In-  
564 sights into alphavirus regulation of genetic diversity. PhD thesis. Universite Paris Diderot, Paris,  
565 France.

- 566 [54] Stapleford KA, Moratorio G, Henningsson R, Chen R, Matheus S, Enfissi A, Weissglas-Volkov D,  
567 Isakov O, Blanc H, Mounce BC, Dupont-Rouzeyrol M. 2016. Whole-genome sequencing analysis  
568 from the chikungunya virus Caribbean outbreak reveals novel evolutionary genomic elements.  
569 PLoS Neglected Tropical Diseases 10(1):e0004402.
- 570 [55] Schwarz MC, Sourisseau M, Espino MM, Gray ES, Chambers MT, Tortorella D, Evans MJ.  
571 2016. Rescue of the 1947 Zika virus prototype strain with a cytomegalovirus promoter-driven  
572 cDNA clone. MSphere 1(5):e00246-16.
- 573 [56] Pastorino B, Bessaud M, Grandadam M, Murri S, Tolou HJ, Peyrefitte CN. 2005. Development  
574 of a TaqMan RT-PCR assay without RNA extraction step for the detection and quantification  
575 of African Chikungunya viruses. Journal of Virological Methods 124(1-2):65-71.
- 576 [57] Kirkwood TB, Bangham CR. 1994. Cycles, chaos, and evolution in virus cultures: a model of  
577 defective interfering particles. Proceedings of the National Academy of Sciences 91(18):8685-9.
- 578 [58] Nowak MA, Bonhoeffer S, Hill AM, Boehme R, Thomas HC, McDade H. 1996. Viral dynamics  
579 in hepatitis B virus infection. Proceedings of the National Academy of Sciences 93(9):4398-402.
- 580 [59] Efron B, Tibshirani R. 1986. Bootstrap methods for standard errors, confidence intervals, and  
581 other measures of statistical accuracy. Statistical Science 1:54-75.

582 **Tables**

| Description                 | Parameter        | Value, 95% CI ( $\text{h}^{-1}$ )                             |                       |
|-----------------------------|------------------|---------------------------------------------------------------|-----------------------|
|                             |                  | CHIKV                                                         | ZIKV                  |
| Infectious virus decay rate | $c$              | 0.05, [0.03, 0.06]                                            | 0.072, [0.069, 0.076] |
| RNA genome decay rate       | $c_{\text{rna}}$ | $2.2 \times 10^{-10}$ , [ $10^{-10}$ , $3.7 \times 10^{-3}$ ] | 0.01, [0.0082, 0.011] |

**Table 1:** Best-fit parameter values and 95% confidence intervals obtained from fitting equations (1) and (2) to total RNA genome abundances and viral titres, respectively, from the RNA genome degradation assays with the corresponding titre quantifications to assess infectivity of CHIKV (Figure 1a) and ZIKV (Figure 1b) over time.

| Parameter | Description                  | Units                                                  | Mean, Median, [95% CI]                         |                                       |                                       |
|-----------|------------------------------|--------------------------------------------------------|------------------------------------------------|---------------------------------------|---------------------------------------|
|           |                              |                                                        | low                                            | high                                  | total                                 |
| $n_E$     | Eclipse compartments         | -                                                      | 17, 16, [8, 34]                                | 26, 27, [9, 40]                       | 27, 28, [14, 40]                      |
| $n_I$     | Infectious compartments      | -                                                      | 20, 20[2, 39]                                  | 19, 19, [1, 39]                       | 21, 21, [2, 40]                       |
| $\beta_V$ | Rate of infection            | $(\text{PFU} \times \text{h})^{-1}$                    | $3.5, 2.4, [1.1 \times, 12.5] \times 10^{-10}$ | $4.3, 1.4, [0.07, 20] \times 10^{-8}$ | $1.8, 1.9, [1.1, 2.4] \times 10^{-7}$ |
| $\tau_E$  | Duration of eclipse phase    | h                                                      | 16.9, 14.6, [10.7, 33.9]                       | 6.5, 6.3, [5.5, 8.5]                  | 9.3, 9.3, [7.2, 11.8]                 |
| $\tau_I$  | Duration of infectious phase | h                                                      | 161.1, 46.5, [0.17, 861.2]                     | 251.3, 107.1, [25.5, 909.3]           | 1.67, 0.89, [0.11, 7.37]              |
| $p$       | Viral genome production rate | $\text{RNA} \times (\text{cell} \times \text{h})^{-1}$ | 35.8, 2.5, [1.5, 391.3] $\times 10^2$          | 3.3, 2.6, [2.1, 3.5]                  | 137.2, 70.6, [8.2, 593.9]             |
| $\alpha$  | Conversion factor            | PFU/RNA                                                | 0.24, 0.23, [0.14, 0.38]                       | 0.31, 0.31, [0.21, 0.45]              | 0.61, 0.59, [0.32, 0.97]              |

**Table 2:** Mean, median and 95% credible intervals for viral parameters associated with ABC fits of the standard viral transmission model (equations (4)) to viral titres and RNA genome abundances obtained from low and high MOI yield assays of CHIKV infection.

| Parameter | Description                  | Units                                                  | Mean, Median, [95% CI]                    |                                          |                                        |
|-----------|------------------------------|--------------------------------------------------------|-------------------------------------------|------------------------------------------|----------------------------------------|
|           |                              |                                                        | low                                       | high                                     | total                                  |
| $n_E$     | Eclipse compartments         | -                                                      | 25, 28, [10, 40]                          | 23, 23, [10, 40]                         | 29, 30, [14, 40]                       |
| $n_I$     | Infectious compartments      | -                                                      | 20, 20, [2, 40]                           | 20, 21, [1, 39]                          | 20, 21, [2, 40]                        |
| $\beta_V$ | Rate of infection            | $(\text{PFU} \times \text{h})^{-1}$                    | $1.4, 1.3, [0.00002, 3.5] \times 10^{-7}$ | $4.7, 0.93, [0.04, 30.6] \times 10^{-8}$ | $2.1, 2.1, [0.5, 3.5] \times 10^{-7}$  |
| $\tau_E$  | Duration of eclipse phase    | h                                                      | 50.9, 38.8, [30.4, 97.7]                  | 38.4, 37.7, [28.1, 51.5]                 | 36.4, 36, [28.9, 46.6]                 |
| $\tau_I$  | Duration of infectious phase | h                                                      | 89.7, 6.1, [0.12, 762.4]                  | 15.6, 3.3, [0.12, 46]                    | 20, 2.3, [0.12, 195.4]                 |
| $p$       | Viral genome production rate | $\text{RNA} \times (\text{cell} \times \text{h})^{-1}$ | 5.8, 2.9, [0.06, 27.8] $\times 10^6$      | 1.5, 0.3, [0.03, 9.3] $\times 10^6$      | 1.7, 0.5, [0.03, 9.5] $\times 10^6$    |
| $\alpha$  | Conversion factor            | PFU/RNA                                                | 6.4, 5.9, [3.2, 13.8] $\times 10^{-4}$    | 7.6, 9, [4.4, 10.2] $\times 10^{-4}$     | 6.8, 6.3, [3.2, 13.2] $\times 10^{-4}$ |

**Table 3:** Mean, median and 95% credible intervals for viral parameters associated with ABC fits of the standard viral transmission model (equations (4)) to viral titres and RNA genome abundances obtained from low and high MOI yield assays of ZIKV infection.

| Parameter | Description                  | Units                                                  | Mean, Median, [95% CI]                    |                                            |                                             |
|-----------|------------------------------|--------------------------------------------------------|-------------------------------------------|--------------------------------------------|---------------------------------------------|
|           |                              |                                                        | low                                       | high                                       | total                                       |
| $n_E$     | Eclipse compartments         | -                                                      | 21, 21, [5, 40]                           | 28, 29, [12, 40]                           | 25, 27, [8, 40]                             |
| $n_I$     | Infectious compartments      | -                                                      | 20, 21, [2, 40]                           | 21, 22, [2, 40]                            | 21, 20, [2, 40]                             |
| $\beta_C$ | Rate of infection            | $(\text{PFU} \times \text{h})^{-1}$                    | 0.95, 0.04, [4.8 $\times 10^{-6}$ , 7.36] | 0.67, 0.005, [1.54 $\times 10^{-6}$ , 7.1] | 0.35, 0.007, [7.59 $\times 10^{-5}$ , 4.42] |
| $\tau_E$  | Duration of eclipse phase    | h                                                      | 10.5, 7.5, [6.6, 34.3]                    | 6.1, 6.0, [5.3, 7.4]                       | 7.0, 6.7, [5.8, 9.1]                        |
| $\tau_I$  | Duration of infectious phase | h                                                      | 218.5, 98.6, [34.5, 876]                  | 244.7, 132.8, [0.3, 903.4]                 | 247.8, 134.5, [34.2, 875.2]                 |
| $p$       | Viral genome production rate | $\text{RNA} \times (\text{cell} \times \text{h})^{-1}$ | 1.89, 1.86, [1.5, 2.5]                    | 998.4, 2.4, [1.8, 8464.5]                  | 2.7, 2.0, [1.6, 2.7]                        |
| $\alpha$  | Conversion factor            | $\text{PFU}/\text{RNA}$                                | 0.24, 0.24, [0.16, 0.35]                  | 0.3, 0.3, [0.2, 0.4]                       | 0.3, 0.3, [0.2, 0.4]                        |

**Table 4:** Mean, median and 95% credible intervals for viral parameters associated with ABC fits of the cell-to-cell viral transmission model (equations (4)) to viral titres and RNA genome abundances obtained from low and high MOI yield assays of CHIKV infection.

| Parameter | Description                  | Units                                                  | Mean, Median, [95% CI]                       |                                            |                                           |
|-----------|------------------------------|--------------------------------------------------------|----------------------------------------------|--------------------------------------------|-------------------------------------------|
|           |                              |                                                        | low                                          | high                                       | total                                     |
| $n_E$     | Eclipse compartments         | -                                                      | 23, 23, [6, 39]                              | 22, 21, [7, 40]                            | 24, 24, [10, 40]                          |
| $n_I$     | Infectious compartments      | -                                                      | 20, 20, [1, 39]                              | 20, 20, [2, 39]                            | 20, 20, [1, 39]                           |
| $\beta_C$ | Rate of infection            | $(\text{PFU} \times \text{h})^{-1}$                    | 0.035, 0.0015, [6.3 $\times 10^{-5}$ , 0.24] | 0.73, 0.008 [1.63 $\times 10^{-5}$ , 7.87] | 0.1, 0.003, [6.56 $\times 10^{-5}$ , 0.9] |
| $\tau_E$  | Duration of eclipse phase    | h                                                      | 39.8, 37.3, [27.8, 74.4]                     | 37.9, 37.6, [25.3, 53.3]                   | 37.5, 36.4, [27.7, 55.4]                  |
| $\tau_I$  | Duration of infectious phase | h                                                      | 104.9, 10.3, [0.13, 845.7]                   | 30.7, 3.5, [0.1, 362.4]                    | 85.5, 7.0, [0.13, 790.5]                  |
| $p$       | Viral genome production rate | $\text{RNA} \times (\text{cell} \times \text{h})^{-1}$ | 1.6, 0.13, [0.023, 10.8] $\times 10^6$       | 1.4, 0.26, [0.018, 8.2] $\times 10^6$      | 1.2, 1.6, [0.019, 8.2] $\times 10^6$      |
| $\alpha$  | Conversion factor            | $\text{PFU}/\text{RNA}$                                | 7.1, 6.5, [3.3, 14.1] $\times 10^{-4}$       | 7.5, 7.4, [4.4, 11.3] $\times 10^{-4}$     | 7.4, 7.0, [3.7, 12.7] $\times 10^{-4}$    |

**Table 5:** Mean, median and 95% credible intervals for viral parameters associated with ABC fits of the cell-to-cell viral transmission model (equations (4)) to viral titres and RNA genome abundances obtained from low and high MOI yield assays of ZIKV infection.

| Description                  | Parameter | Units                                | Value, [95% CI]                      |                                    |
|------------------------------|-----------|--------------------------------------|--------------------------------------|------------------------------------|
|                              |           |                                      | CHIKV                                | ZIKV                               |
| Rate of infection            | $\beta_C$ | $(\text{cell} \times \text{h})^{-1}$ | 4.2, [0.03, 1154.5] $\times 10^{-3}$ | 3.5, [0.57, 24.6] $\times 10^{-4}$ |
| Duration of eclipse phase    | $\tau_E$  | h                                    | 6.4, [5.6, 7.3]                      | 29.4, [25.4, 31.3]                 |
| Duration of infectious phase | $\tau_I$  | h                                    | 44.8, [24.9, 87.6]                   | 31.4, [15.9, 169.4]                |
| Viral genome production rate | $p$       | $\text{RNA} \times \text{h}^{-1}$    | 2.4, [1.5, 6.8]                      | 3.3, [1.5, 7.8] $\times 10^4$      |
| Conversion factor            | $\alpha$  | $\text{PFU} \times \text{RNA}^{-1}$  | 0.18, [0.1, 0.26]                    | 6.3, [2.2, 9.2] $\times 10^{-4}$   |

**Table 6:** Parameter values and 95% confidence intervals obtained from least-square fitting of equations (4) to viral titres and total RNA genome abundances from the high and low MOI CHIKV (Figures 7a and 7b) and ZIKV (Figures 7c and 7d) yield assays.



|                           | CHIKV                 | ZIKV                              |
|---------------------------|-----------------------|-----------------------------------|
| Forward primer (5' to 3') | GAGACACACGTAGCCTACCA  | TCGTTGCCCAACACAAG                 |
| Reverse primer (5' to 3') | GGTTCCACCTCAAACATGGG  | CCACTAATGTTCTTTTG<br>CAGACAT      |
| Probe (5' [6-FAM] to 3')  | ACGCACGTTGCAGGGCCTTCA | GCCTACCTTGACAAGCA<br>ATCAGACACTCA |

**Table 7:** The primer and probe sets used for CHIKV and ZIKV.

583 **Figures**

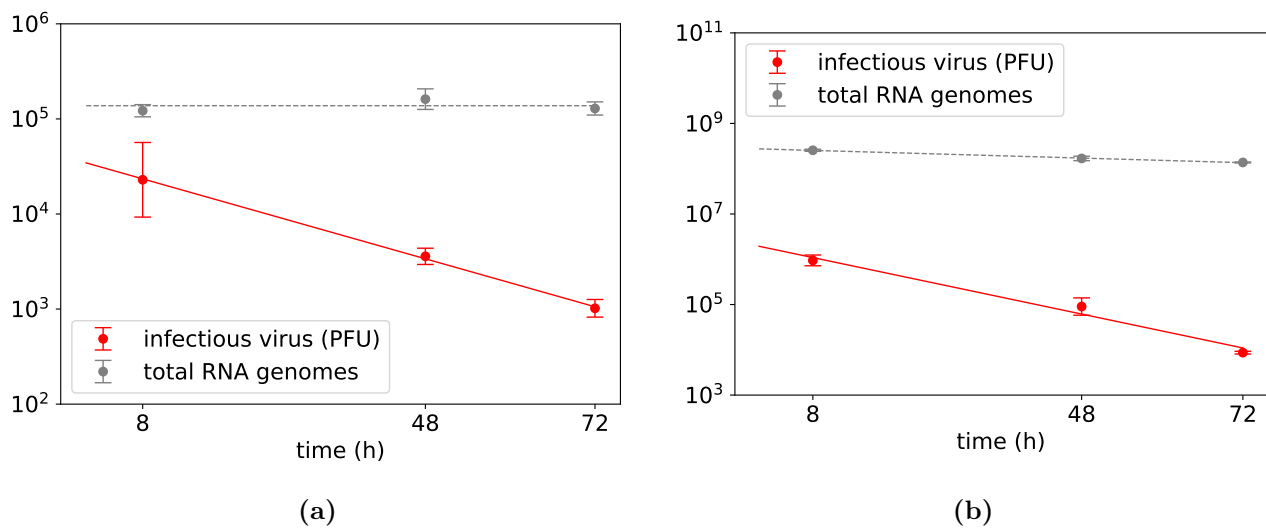

**Figure 1:** Cell-free experiment to determine stability of RNA genomes (grey dots) and loss of infectivity (red dots) of (a) CHIKV and (b) ZIKV subjected to the physical conditions of the *in vitro* experiments over 72h. The best fits of equations (1) and (2) describing the decay of RNA genomes and viral infectivity, respectively, are displayed as dashed and solid lines, respectively. Data are shown as the mean  $\pm$  standard deviation. The best-fit parameter values and 95% confidence intervals are in Table 1.

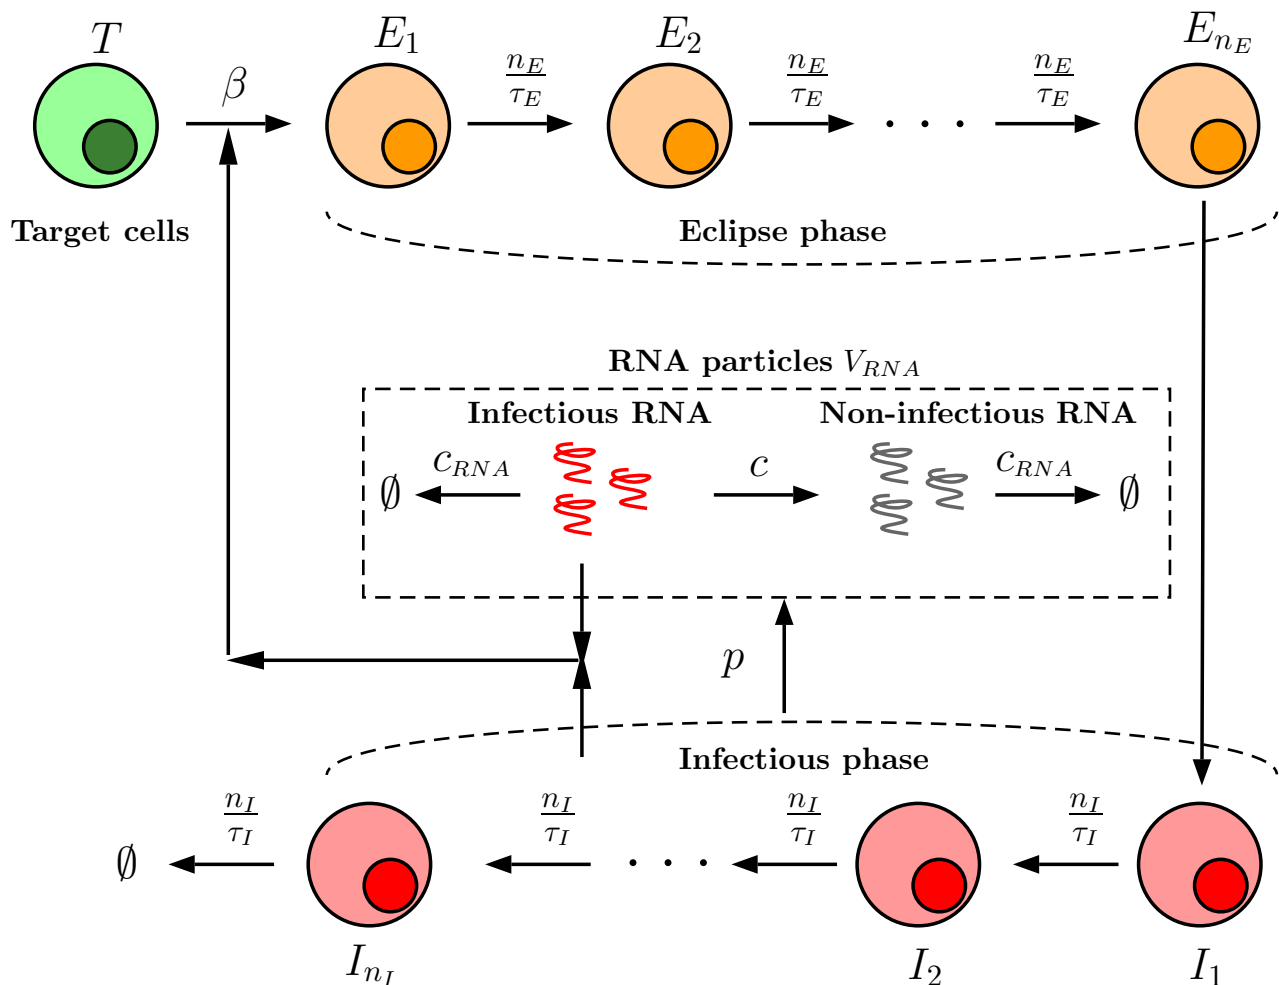

**Figure 2:** Graphical representation of the mathematical model (4) describing the *in vitro* viral kinetics. Susceptible cells ( $T$ ) may get infected either by extracellular free virus entering susceptible cells at the rate ( $\beta_V V_{\text{pfu}}$ ) or when virus invades susceptible cells from virus-producing cells via cell-to-cell transmission at the rate ( $\beta_C V_{\text{pfu}}$ ). Upon successful virus infection, susceptible cells enter an eclipse phase which is divided into  $n_E$  sub-phases each of which last  $(n_E/\tau_E)$  time units. Thus, the duration of eclipse phase is  $\tau_E$  time units and  $(E_1), \dots, (E_{n_E})$  are cells in eclipse sub-phases. Only cells in the last sub-phase of eclipse phase ( $E_{n_E}$ ) enter infectious phase in which they become virus-producing. Infectious phase is divided into  $n_I$  sub-phases each of which last  $(n_I/\tau_I)$  time units. Thus, the duration of infectious phase is  $\tau_I$  time units and  $(I_1), \dots, (I_{n_I})$  are cells in infectious sub-phases. Cells in any infectious sub-phase produce virus at the rate ( $p$ ). Only cells in the last sub-phase of infectious phase ( $I_{n_I}$ ) exit the system at the rate  $(n_I/\tau_I)$ . Infectious virus loses infectivity at the rate ( $c$ ) and viral genomes lose stability at the rate ( $c_{\text{rna}}$ ).

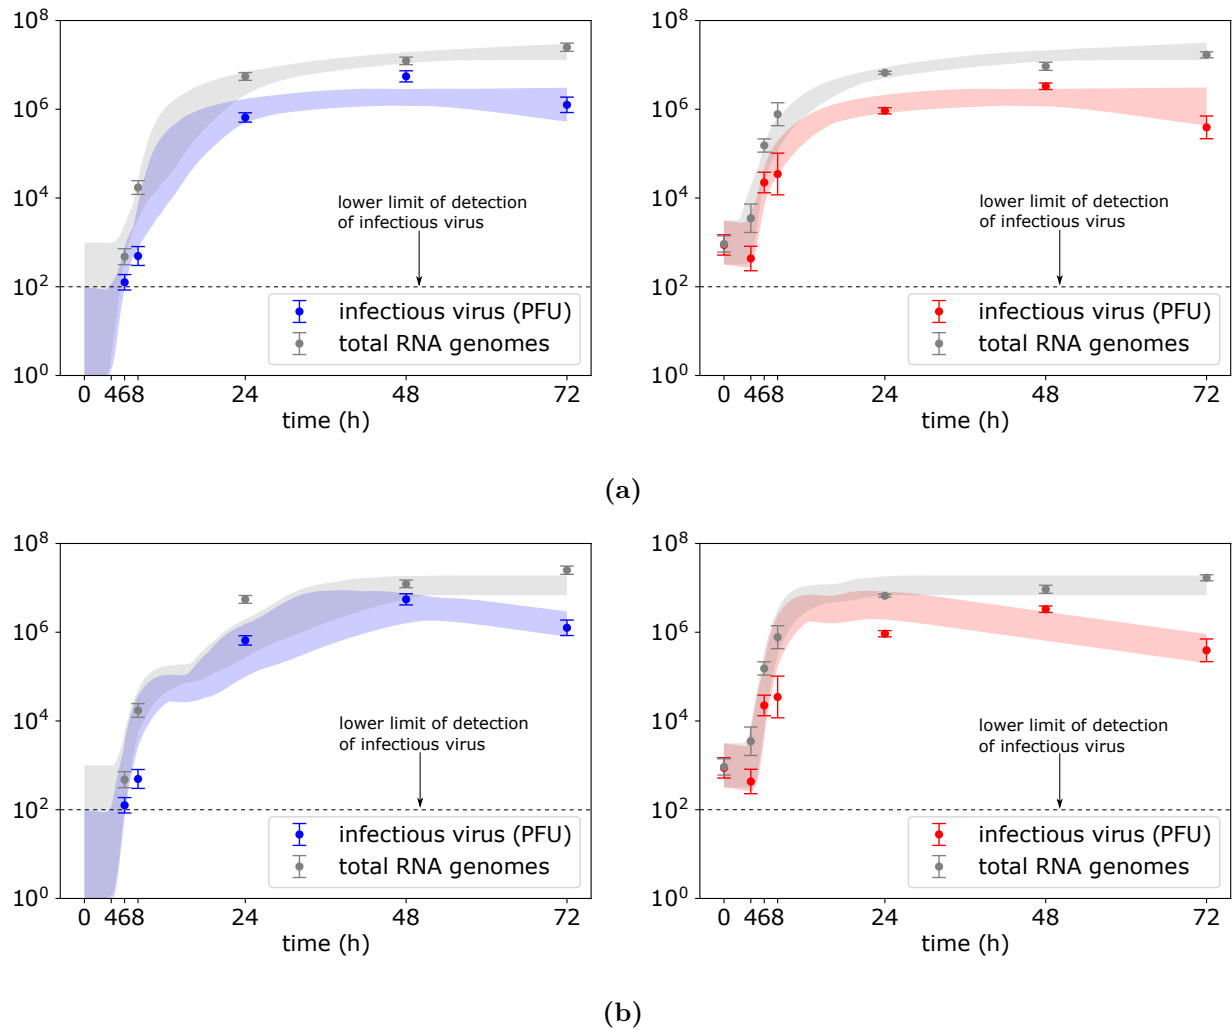

**Figure 3:** One thousand best ABC fits of the (a) standard (b) cell-to-cell transmission model to low (left panel) and high (right panel) MOI datasets depicted as filled areas around the time course CHIKV titres and total RNA genome abundances. Data are shown as the mean  $\pm$  standard deviation and model was fit to low and high MOI datasets simultaneously.

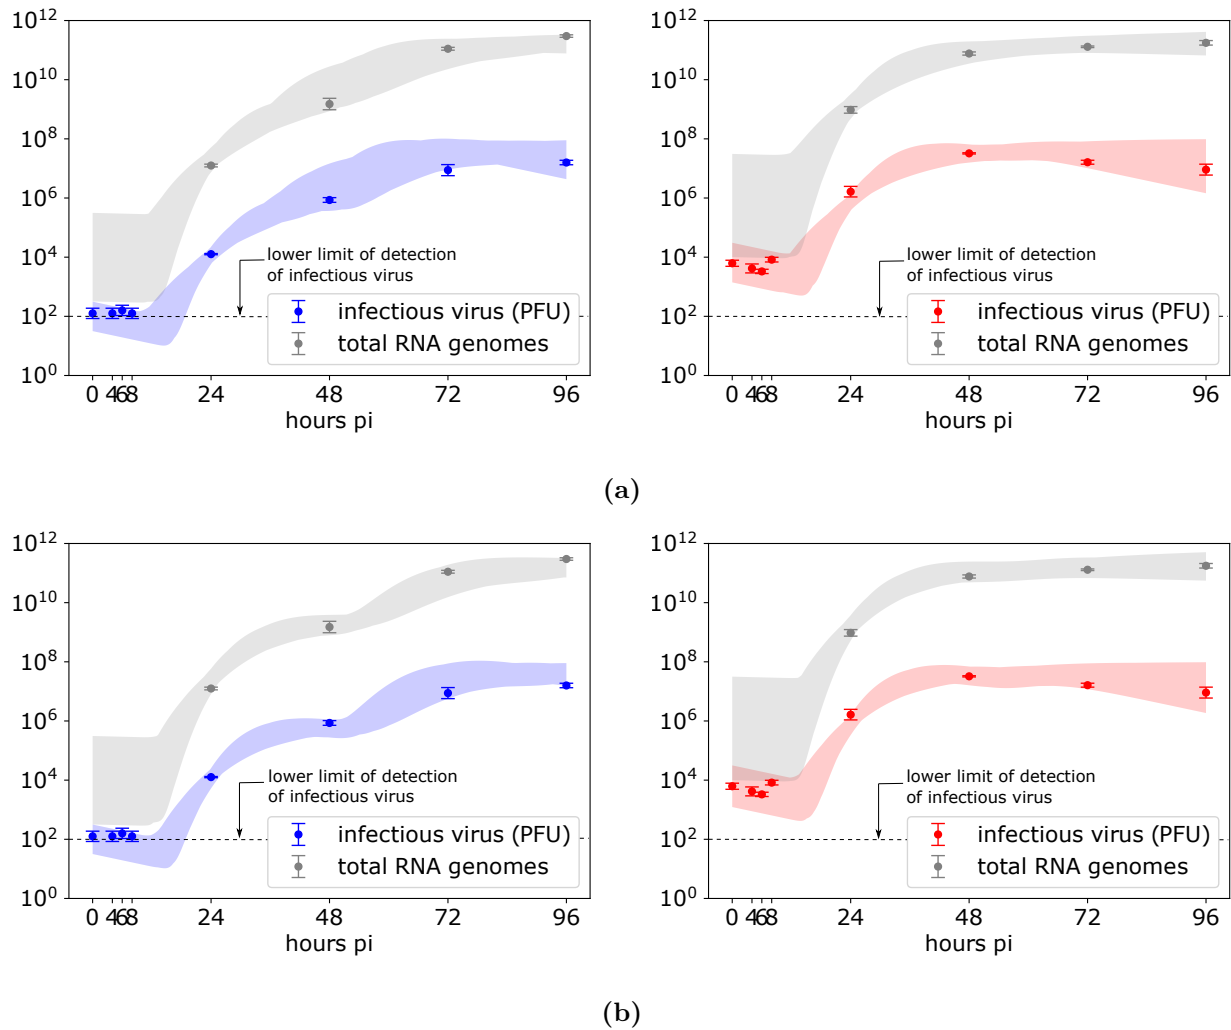

**Figure 4:** One thousand best ABC fits of the (a) standard (b) cell-to-cell transmission model to low (left panel) and high (right panel) MOI datasets depicted as filled areas around the time course ZIKV titres and total RNA genome abundances. Data are shown as the mean  $\pm$  standard deviation and model was fit to low and high MOI datasets simultaneously.

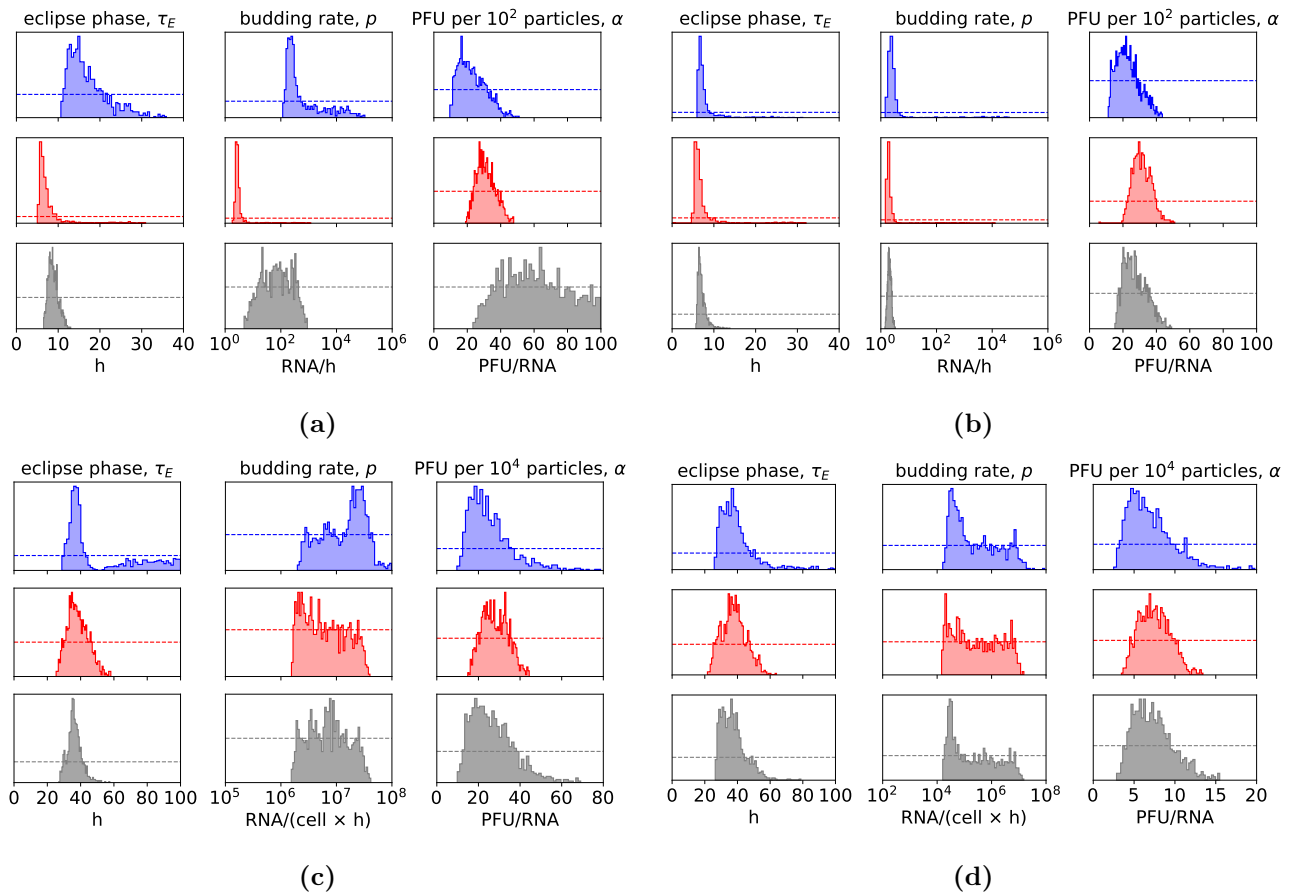

**Figure 5:** The posterior distributions of the select viral parameters obtained from ABC fits of the standard transmission model to (a) CHIKV and (c) ZIKV low (blue), high (red) and both low and high (grey) MOI kinetic data. The posterior distributions of the select viral parameters obtained from ABC fits of the cell-to-cell transmission model to (b) CHIKV and (d) ZIKV low (blue), high (red) and both low and high (grey) MOI kinetic data. The horizontal dashed lines indicate the initial prior (uniform) distribution from which the viral parameter values were sampled. The bounds imposed on viral parameters are in Material and Methods.

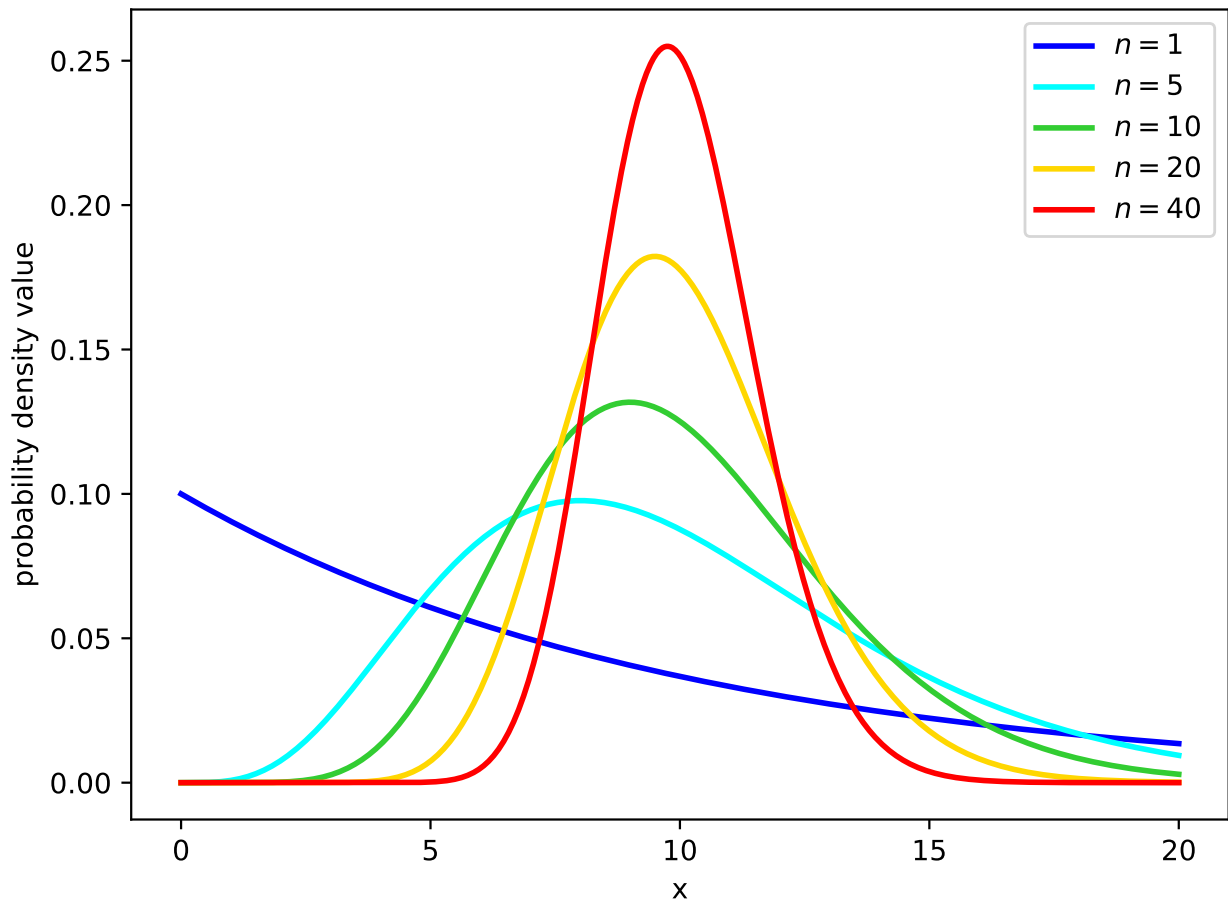

**Figure 6:** Probability density (y-axis) that a cell spends  $x$  hours in the (eclipse or infectious) phase. As the Erlang shape parameter ( $n_E$  or  $n_I$  in the model (4) for the eclipse and virus-producing phases, respectively) is increased, the distribution of the phase duration shifts from an exponential ( $n = 1$ ), to a fat-tailed ( $1 < n < 10$ ), to a normal-like ( $n \gg 10$ ) distribution. In these graphs, the mean time spent by cells in the phase ( $\tau_E$  or  $\tau_I$  in the model (4), respectively) is fixed (set to 10h, chosen arbitrarily) as the shape parameter ( $n_E$  or  $n_I$ ) is varied.

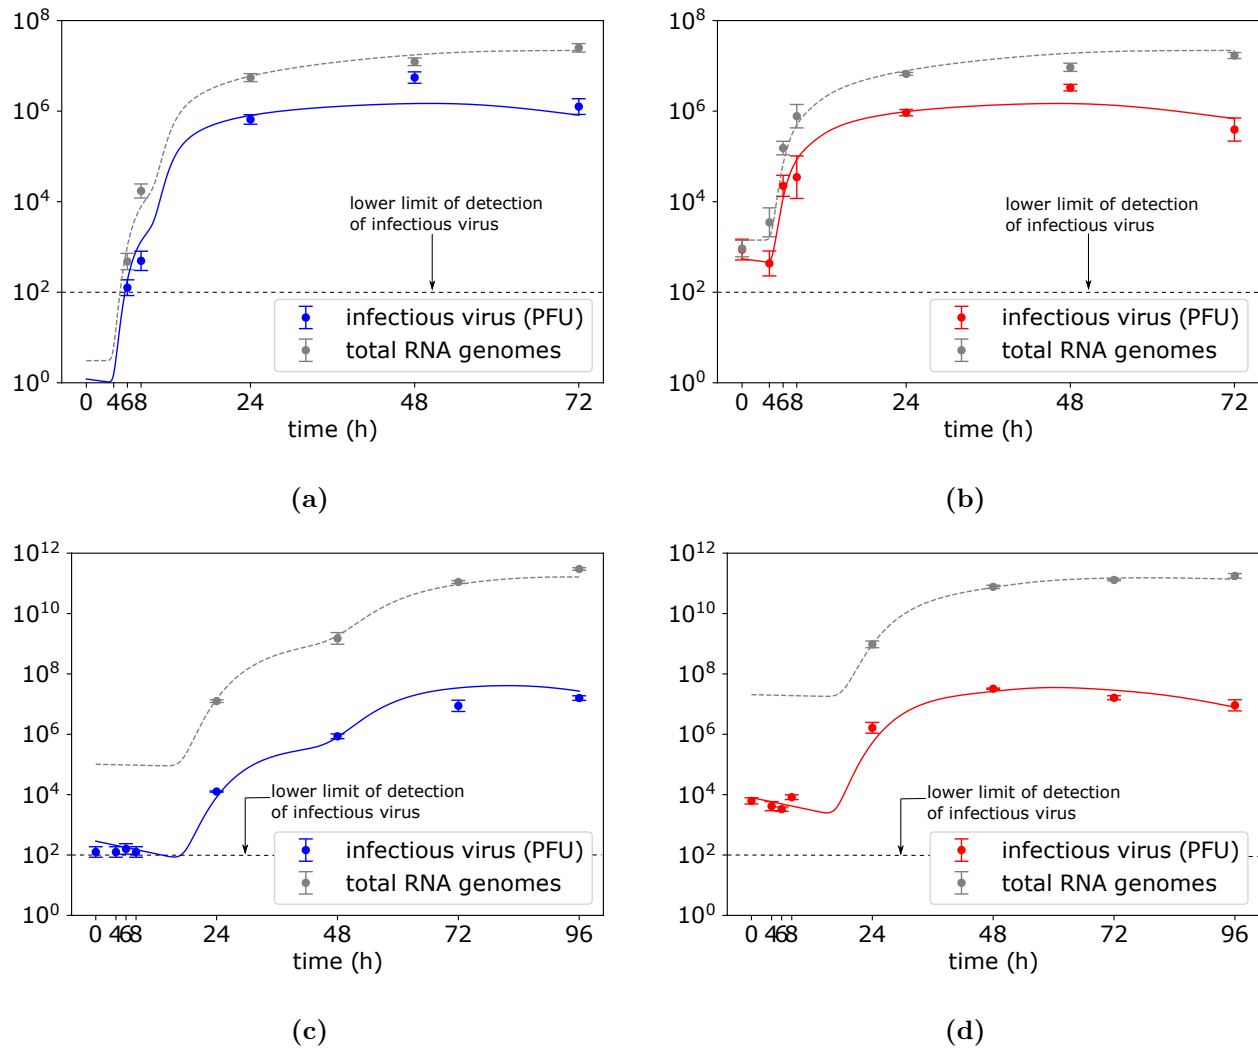

**Figure 7:** CHIKV and ZIKV kinetics that corresponds to the best-fit parameters obtained from the least-square fitting of the cell-to-cell viral transmission model (4) to (a) low and (b) high CHIKV MOI dataset, and (c) low and (d) high ZIKV MOI dataset. Data are shown as the mean  $\pm$  standard deviation. The best-fit parameter values dictating CHIKV kinetics are in Table 6.
